# Supplementary material
Source: publisher figshare collection journal article supplement (https://acs.figshare.com/ndownloader/files/4126624)
Supplement: Supplementary file 1 [file 4126624]

# Layered Titanium Disilicide Stabilized by Oxide Coating for Highly Reversible Lithium Insertion and Extraction

*Sa Zhou, Zachary I. Simpson, Xiaogang Yang, and Dunwei Wang*

Department of Chemistry, Merkert Chemistry Center, Boston College, 2609 Beacon St.,  
Chestnut Hill, Massachusetts 02467

**1. Comparison of cycling performances of  $\text{TiSi}_2$  with and without  $\text{SiO}_2$  overlayer.**

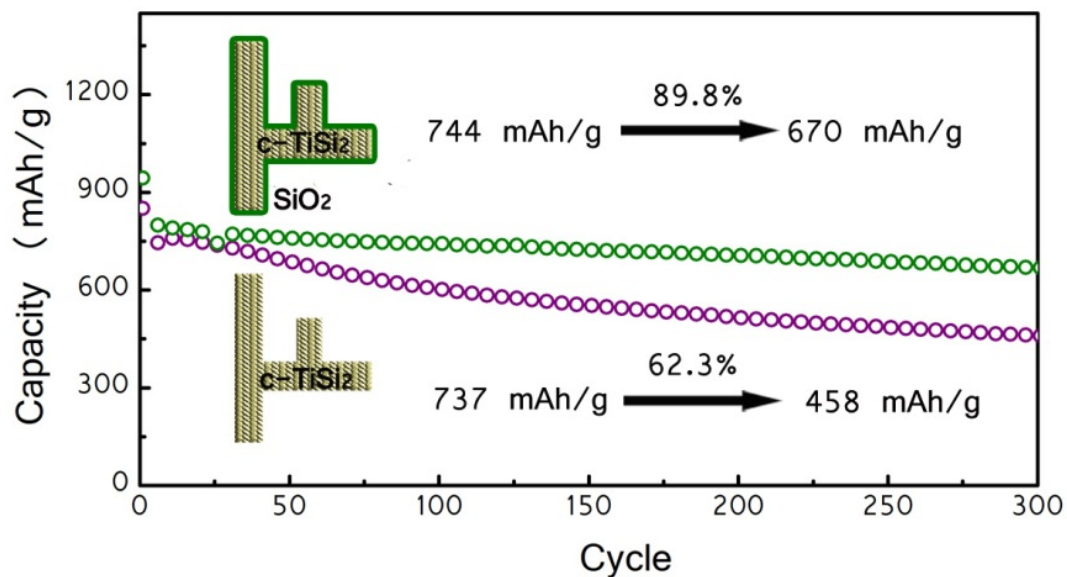

**Figure S1.** Cycling performance of  $\text{TiSi}_2$  nanonets with (green) and without (purple)  $\text{SiO}_2$ . From the 26<sup>th</sup> to 300<sup>th</sup> cycles,  $\text{SiO}_2$ -coated nets maintained 89.8% of their capacity, while those without oxide only retained 62.3%. The result indicates the importance of the oxide overlayer for long cycling stability.

## 2. Cycling performance of $\text{TiSi}_2$ nanonets with 1 nm $\text{Al}_2\text{O}_3$ .

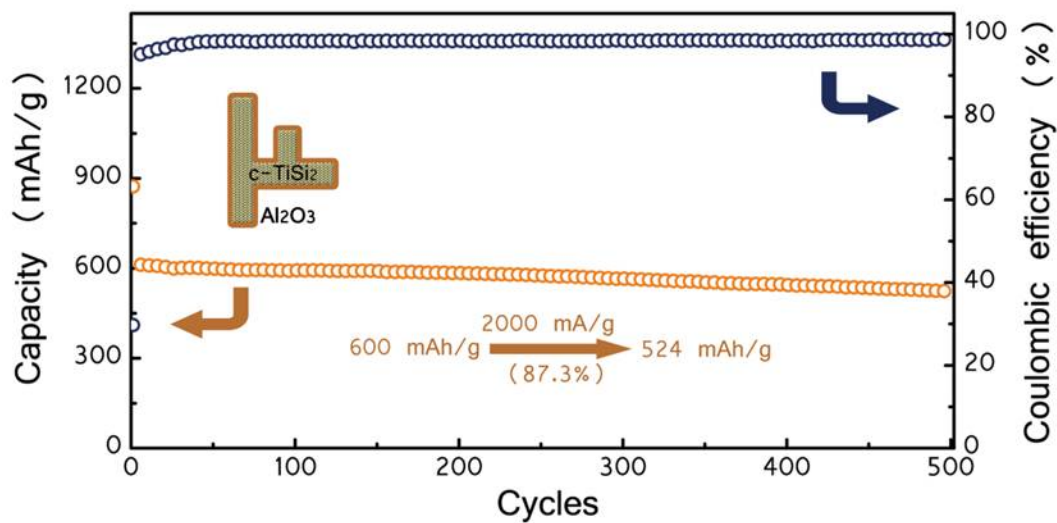

**Figure S2.** Cycling stability of  $\text{TiSi}_2$  nanonets with a 1 nm  $\text{Al}_2\text{O}_3$  coating. Over 500 cycles the capacity maintains 87.3% of the initial value, with a coulombic efficiency close to 99%. Compared with a  $\text{SiO}_2$  coated anode, the capacity of  $\text{Al}_2\text{O}_3$ -coated  $\text{TiSi}_2$  is slightly lower. We suggest that ALD-grown  $\text{Al}_2\text{O}_3$  may be less permeable to  $\text{Li}^+$  than thermally formed  $\text{SiO}_2$ .

### 3. Electrochemical Impedance Spectroscopy (EIS) measurement.

The Nyquist plot of a fully lithiated sample is shown in Figure S1, along with a fitting curve generated by the displayed equivalent electric circuit (EEC). The Nyquist plot comprises a semi-circle and an inclined line; these components contain the information pertaining to the charge transfer and  $\text{Li}^+$  diffusion in the electrode. Two R//Q elements,  $R_c//Q_c$  and  $R_d//Q_d$ , were employed to simulate these processes, resulting a fitting error of  $4.65 \times 10^{-4}$  ( $\chi^2$  value between experimental and simulated data). From the fitting result, we obtained the  $R_c$  value as  $101 \Omega$ . The  $Q_c$  information is as follows:  $\text{CPE} = 8.158 \times 10^{-5} \Omega^{-1} \text{ s}^n$ ;  $n = 0.6335$ .

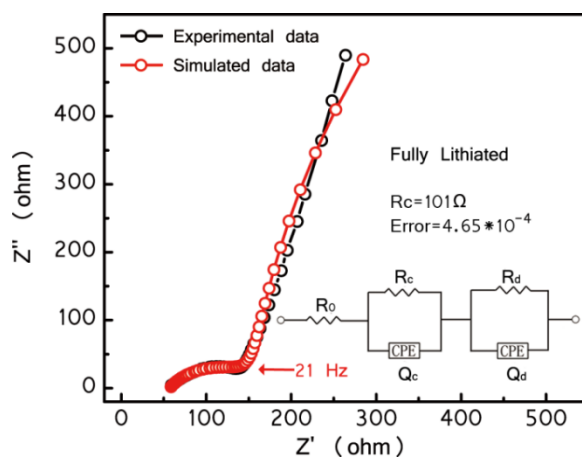

**Figure S3.** Nyquist plot of  $\text{TiSi}_2$  with  $\text{SiO}_2$  at 0.01 V. The experimental data are shown in black and simulated data are obtained by fitting the experimental data with the inset equivalent electric circuit (EEC).<sup>1</sup>

#### 4. Morphology of $\text{TiSi}_2/\text{SiO}_2$ after 100 cycles.

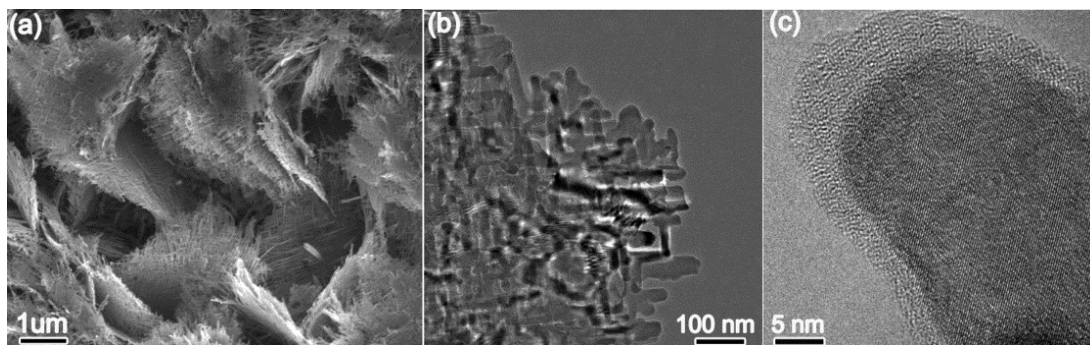

**Figure S4.** Electron micrographs of  $\text{TiSi}_2/\text{SiO}_2$  after 100 cycles of lithiation/delithiation.

(a) A SEM image displaying the densely packed nanonets on the substrate. (b) A low magnification TEM image confirming the well preserved nanonet morphology. (c) A high resolution TEM image shows the crystalline nature of the nanonets after 100 cycles.

### 5. TEM of fully lithiated $\text{TiSi}_2$ .

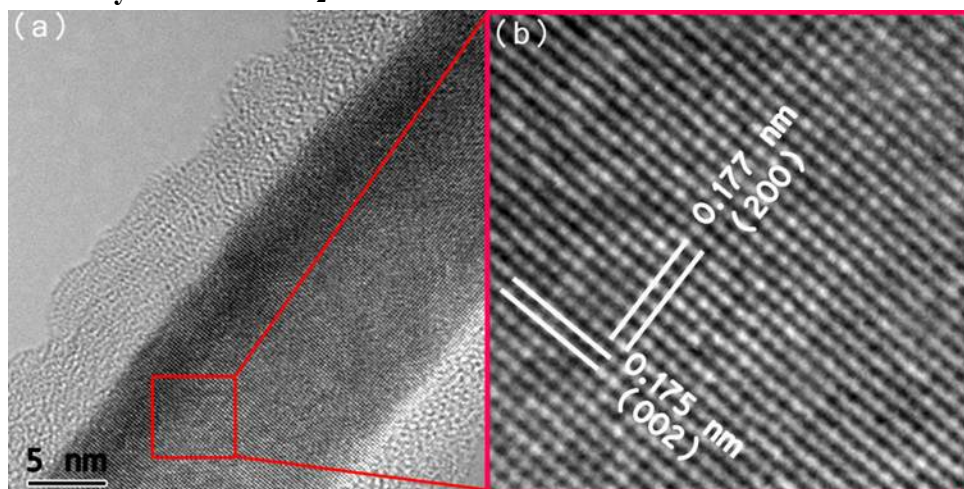

**Figure S5.** TEM images of fully lithiated  $\text{TiSi}_2$  nanonets (0.01V). The enlarged image indicates the lattice of  $\text{TiSi}_2$  along [002] and [200] directions does not exhibit obvious expansion upon full lithiation.

6. SEM images of as-grown and lithiated  $\text{TiSi}_2/\text{SiO}_2$  nanonets.

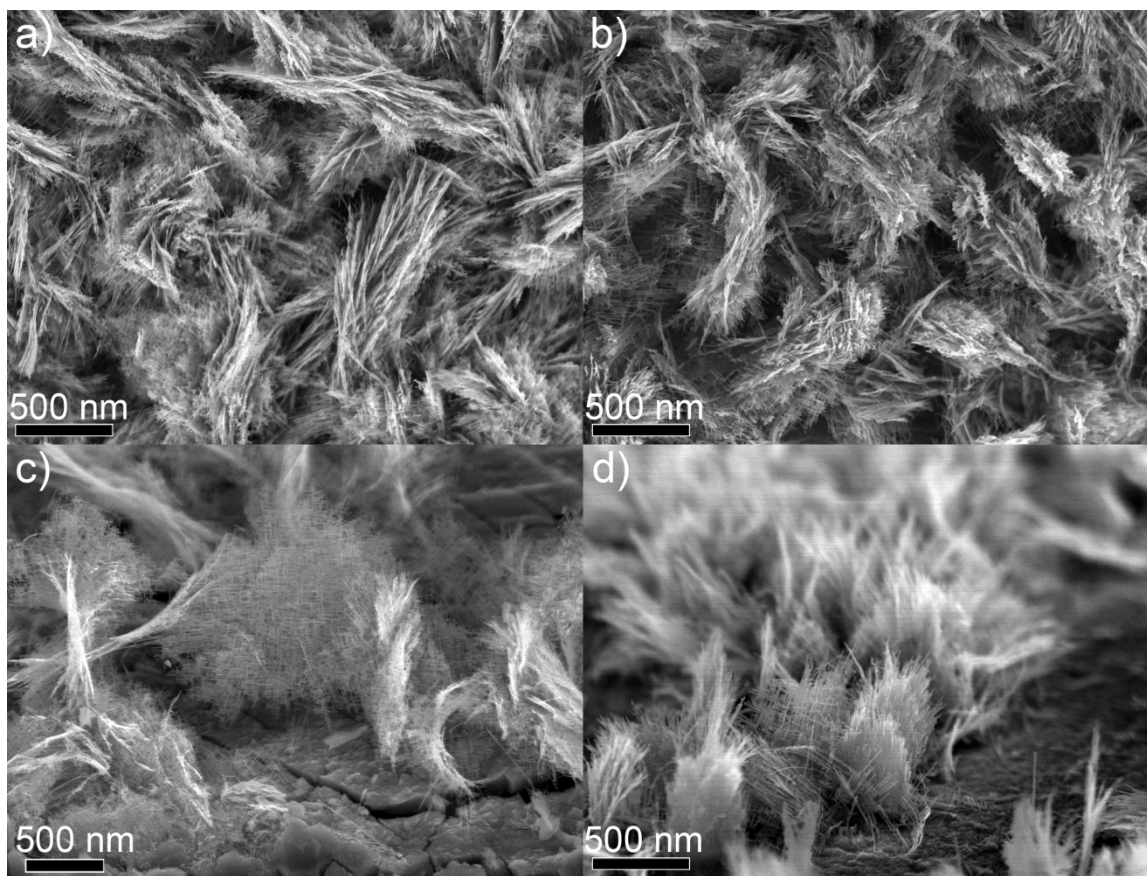

**Figure S6.** SEM images from the top (a,b) and side (c,d) of  $\text{TiSi}_2/\text{SiO}_2$  nanonets before lithiation (a,c) and after complete lithiation (b,d). The lithiated nets were cycled twice and then fully lithiated within a potential window of 1.0 – 0.10 V.

## 7. Oxide coating thickness uniformity.

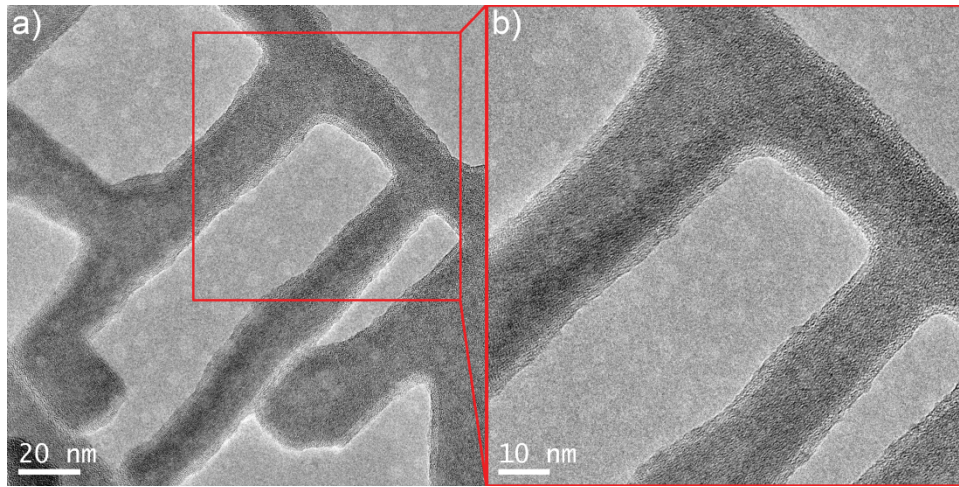

**Figure S7.** a) TEM image of a section of a  $\text{TiSi}_2$  nanonet demonstrating the uniformity of the  $\text{SiO}_2$  coating b) a higher magnification image of the same section for more detail is presented here. Because the coating was not formed due to a post-growth deposition, but rather formed by the oxidation of the nanostructure, the uniformity of the coating is good.



#### **8. Method for the determination of the quantity of nanonets on a sample.**

To measure the amount of active material deposited on a sample, a small piece of the substrate containing the active material was weighed 9 times using a Sartorius CPA2P microbalance. The average mass was calculated; after obtaining the average mass, the active material was removed. After removing the active material, the bare substrate was weighed 9 times, and the mass was averaged. The mass of the bare substrate was subtracted from that of the substrate and active material. The area of the sample was also measured using a pair of digital callipers. With the area and mass, the areal density was calculated. The average areal density of the samples was approximately  $100 \mu\text{g cm}^{-2}$ , and the average active material mass was  $20 \mu\text{g}$ .

9. High-resolution TEM image of the  $\text{TiSi}_2/\text{SiO}_2$  interface.

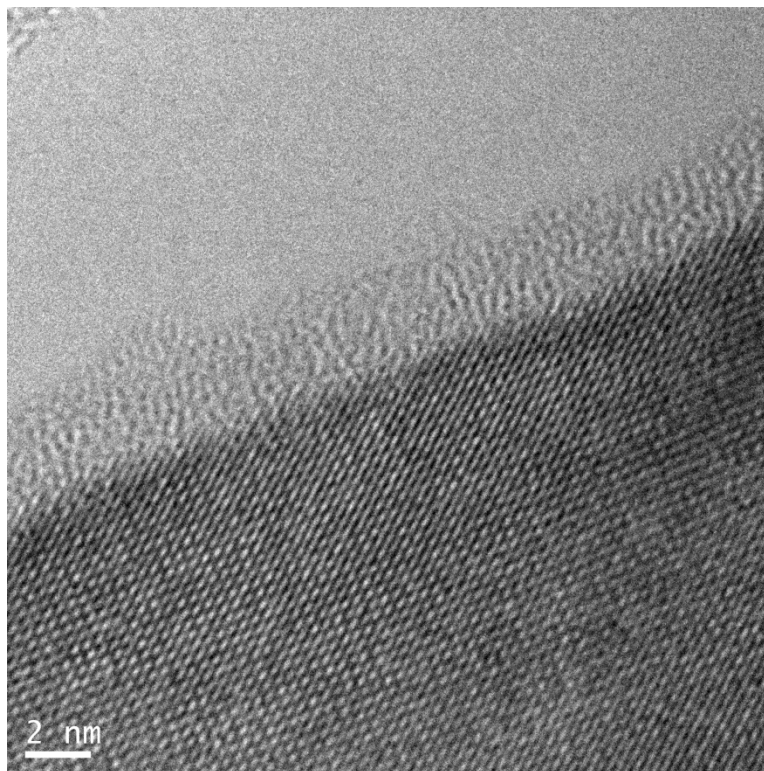

**Figure S8.** A high-resolution TEM image depicting the interface between the  $\text{TiSi}_2$  nanonet and the  $\text{SiO}_2$  coating.

## References

1. Ruffo, R.; Hong, S. S.; Chan, C. K.; Huggins, R. A.; Cui, Y., Impedance Analysis of Silicon Nanowire Lithium Ion Battery Anodes, *J. Phys. Chem. C* **2009**, *113*, 11390-11398.
